# Supplementary material for: In situ voltammetric analysis of 2,4-dichlorophenoxyacetic acid in environmental water using a boron doped diamond electrode and an adapted unmanned air vehicle sampling platform
Source: Royal Society of Chemistry journal article supplement (doi:10.1039/d2ay00050d), 2022-01-01
Supplement: d2ay00050d1.pdf [file d2ay00050d1.pdf]

ARTICLE

Received 00th January 20xx,  
Accepted 00th January 20xx

DOI: 10.1039/x0xx00000x

## ***In situ* voltammetric analysis of 2,4-dichlorophenoxyacetic acid in environmental water using a boron doped diamond electrode and an adapted unmanned air vehicle sampling platform**

José Claudiano Dantas Neto<sup>a</sup>, Vagner Bezerra dos Santos<sup>\*a</sup>, Severino Carlos Bezerra de Oliveira<sup>b</sup>, Willian Toito Suarez<sup>c</sup>, Josiane Lopes de Oliveira<sup>c</sup>

### **Electronic Supplementary Information**

---

<sup>a</sup> *Fundamental Chemistry Department, Federal University of Pernambuco, Recife, PE, Brazil.*

<sup>b</sup> *Department of Chemistry, Federal Rural University of Pernambuco, Recife-PE, Brazil.*

<sup>c</sup> *Department of Chemistry, Federal University of Viçosa, Viçosa, MG, Brazil.*

† *vagner.bsantos@ufpe.br. Av. Jornalista Anibal Fernandes, s/nº, Cidade Universitária, Recife, PE, 50740-560, Brazil.*

Electronic Supplementary Information (ESI) available: [details of any supplementary information available should be included here]. See DOI: 10.1039/x0xx00000x

## ARTICLE

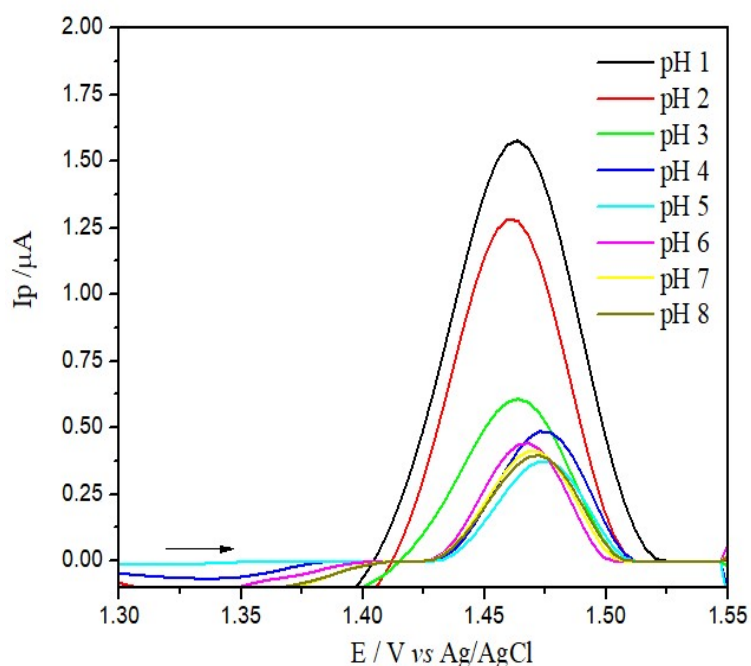

Figure 1S. Study of the pH of the supporting electrolyte using a solution of  $0.5 \text{ mol L}^{-1} \text{ Na}_2\text{SO}_4$  at a concentration of  $10.48 \text{ } \mu\text{mol L}^{-1}$  of 2,4-D. SWV parameters:  $f = 60 \text{ Hz}$ ,  $a = 70 \text{ mV}$ ,  $\Delta E_s = 5 \text{ mV}$ . The pH were regulated with  $\text{H}_2\text{SO}_4$  and  $\text{NaOH}$  solutions, both at  $0.5 \text{ mol L}^{-1}$ .

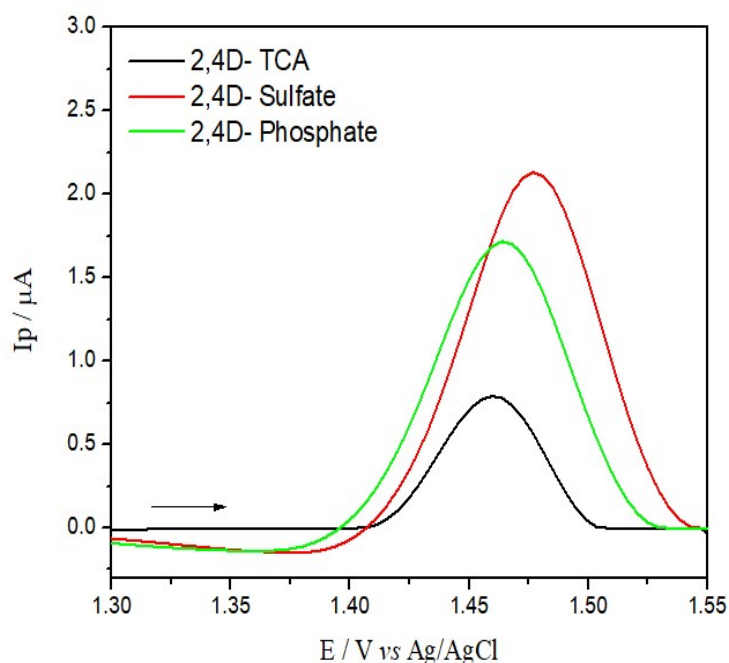

Figure 2S. SW voltammograms obtained from  $10.48 \text{ } \mu\text{mol L}^{-1}$  of 2,4-D for trichloroacetic acid, sodium sulfate and phosphate buffer electrolytes (all  $0.5 \text{ mol L}^{-1}$  with pH adjusted to 2.0 using ). SWV parameters:  $f = 60 \text{ Hz}$ ,  $a = 70 \text{ mV}$ ,  $\Delta E_s = 5 \text{ mV}$ .

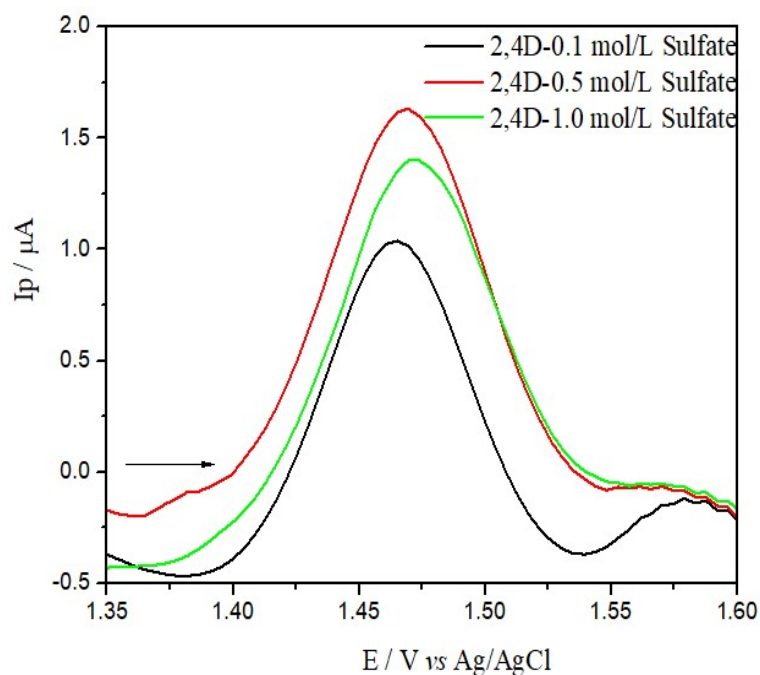

Figure 3S. SWV voltammograms of  $10.48 \mu\text{mol L}^{-1}$  of 2,4-D in sodium sulfate with different concentrations ( $0.1 \text{ mol L}^{-1}$ ,  $0.5 \text{ mol L}^{-1}$  and  $1.0 \text{ mol L}^{-1}$ ), pH was adjusted to 2.0 using  $0.5 \text{ mol L}^{-1}$  sulfuric acid. SWV parameters used:  $f = 60 \text{ Hz}$ ,  $a = 70 \text{ mV}$ ,  $\Delta E_s = 5 \text{ mV}$ .

Table 1S. SWV parameters investigated for detection of 2,4-D with BDDE.

| SWV Parameters    | Studied range | Value selected |
|-------------------|---------------|----------------|
| $a$ (mV)          | 10-100        | 100            |
| $\Delta E_s$ (mV) | 1-10          | 10             |
| $f$ (Hz)          | 10-200        | 200            |

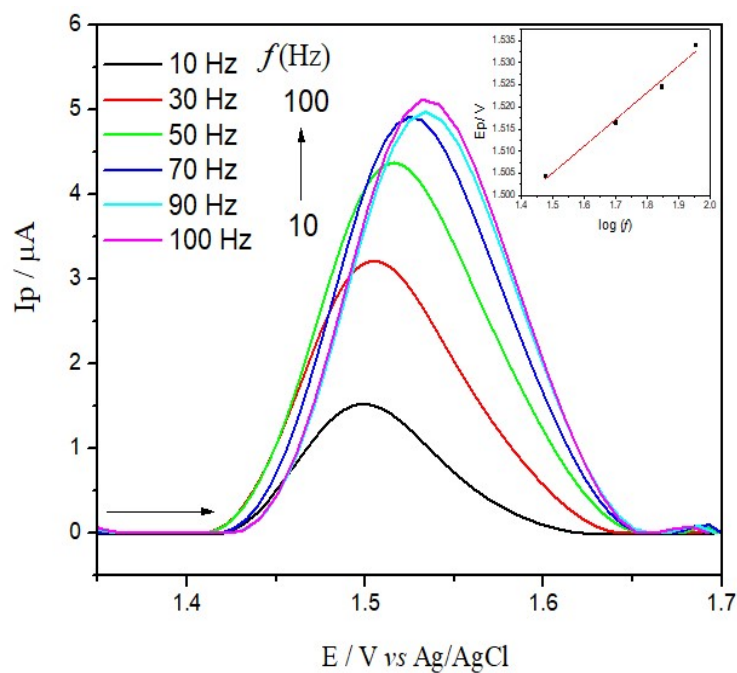

Figure 4S. SW voltammograms obtained from of  $10.43 \mu\text{mol L}^{-1}$  of 2.4-D in sodium sulfate  $0.5 \text{ mol L}^{-1}$ .  $f$  (Hz) = 10, 30, 50, 70, 90, 100 Hz,  $\alpha = 70 \text{ mV}$ ,  $\Delta E_s = 6 \text{ mV}$ . Insertion: Graphic of  $E_p$  vs  $\log f$ . pH was adjusted to 2.0 using  $0.5 \text{ mol L}^{-1}$  sulfuric acid.

Table 2S. Relative error values obtained in interfering studies.

| Relative error (%) |                  |               |                 |
|--------------------|------------------|---------------|-----------------|
| $\text{K}^+$       | $\text{Cu}^{2+}$ | $\text{Cl}^-$ | $\text{NO}_3^-$ |
| 0.98               | 2.37             | 3.24          | 2.89            |

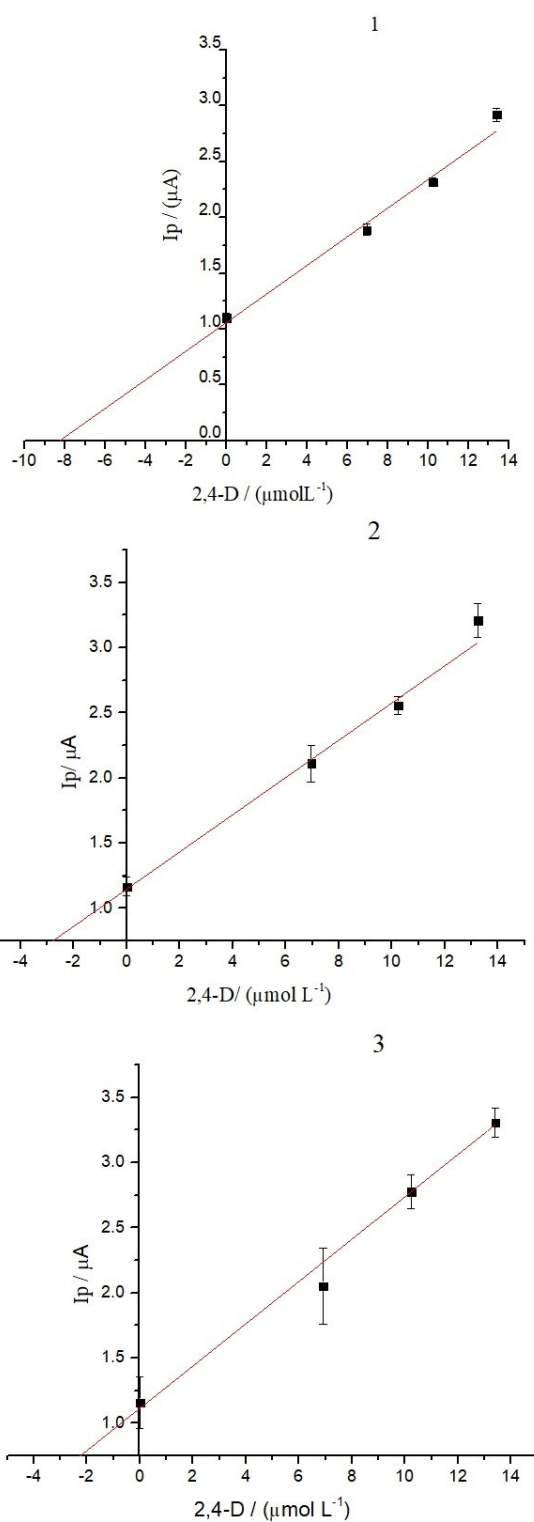

Figure 5S. Standard addition curves for quantification of 2,4-D in spiked water samples (1, 2 and 3) collected using adapted UAV with *in situ* analysis by SWV. SWV parameters:  $f = 60$  Hz,  $a = 70$  mV,  $\Delta E_s = 5$  mV.

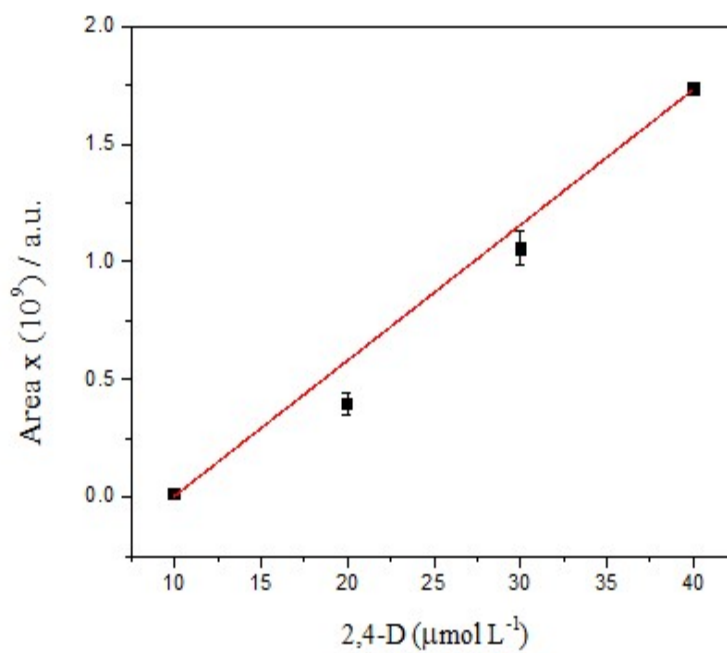

Figure 6S: Analytical curve for detection of 2,4-D in water using the GC-MS method. The measures were performed in triplicate.
